# Supplementary material for: Nanomechanical identification of liquid reagents in a microfluidic channel
Source: Royal Society of Chemistry journal article supplement (doi:10.1039/c3lc51273h), 2014-01-01
Supplement: c3lc51273h.pdf [file c3lc51273h.pdf]

# Supplementary information for “Nanomechanical identification of liquid reagents in a microfluidic channel”

M. Faheem Khan, Seonghwan Kim, Dongkyu Lee, Silvan Schmid, Anja Boisen &

Thomas Thundat

## Device fabrication

A bimetallic microchannel cantilever is fabricated using silicon rich silicon nitride (SRN) which produces a transparent microchannel (refractive index 2.02) on the visible spectrum<sup>1</sup>. On four inch wafers, 10mm x 5mm BMC chips are fabricated at Danchip (a nanofabrication facility in Denmark) at the Technical University of Denmark. A 500 nm SRN film is deposited on a 350  $\mu\text{m}$  thick substrate. This creates the bottom of the microchannel on a cantilever and is followed by adding a 3  $\mu\text{m}$  thick layer of polysilicon as a sacrificial material. The patterned sacrificial layer is then covered by another 500 nm thick SRN film in order to create the walls and top of the microchannel. All of the deposition is performed using a low pressure chemical vapor deposition (LPCVD) technique. Later, the sacrificial material is wet etched using potassium hydroxide (KOH) at 80 °C. Up to 18 hours may be required in order to completely etch the sacrificial material depending on the length of the microchannel. Etching of the SRN layers is almost negligible in KOH. Additionally, the low stress nature of the silicon nitride assists in keeping the microchannel free of cracks. A 350  $\mu\text{m}$  thick substrate is used specifically in order to keep the inlet on the back side of the chip 550  $\mu\text{m}$  wide. This creates an opening of 100  $\mu\text{m}$  on the top using KOH etching while following the anisotropic Si etch along 111 plane. On a 44  $\mu\text{m}$  wide and 500  $\mu\text{m}$  long cantilever, a U-shaped microfluidic channel (16  $\mu\text{m}$  wide, 1050  $\mu\text{m}$  long and 3  $\mu\text{m}$  high) is fabricated. The height to width ratio is appropriate for the passage of small biological cells, while the U-shape of the microchannel allows for smooth flow inside the channel. Using an e-beam evaporator on the bottom side of the cantilever, a 500 nm thick layer

of aluminum is deposited in order to make the cantilever a bimorph structure. This makes the cantilever to deflect on a change in the local heat on the cantilever. The chip has two openings (at the bottom) in order to provide fluidic interfaces between the chip and the macro sized Teflon tubes. The BMC has straight sample delivery channels (SDC) which are 3  $\mu\text{m}$  high, 150  $\mu\text{m}$  wide and 900  $\mu\text{m}$  long. The SDC's are supported by micropillars (5  $\mu\text{m}$  in diameter) in order to avoid collapse when a vacuum is created in the channels to load a sample.

## Experimental setup

The details of the experimental setup are available under “methods” in the main article.

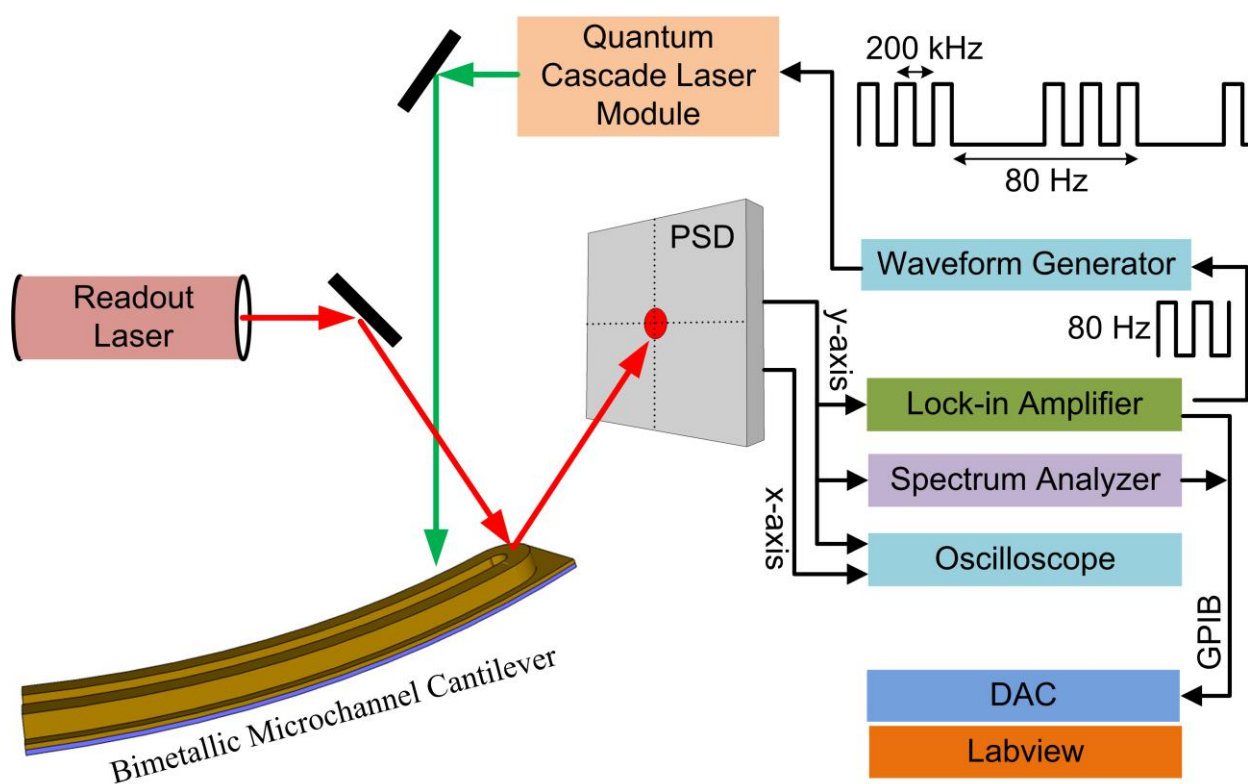

**Fig. S1.** Experimental setup of measurement of nanomechanical IR spectra of liquids

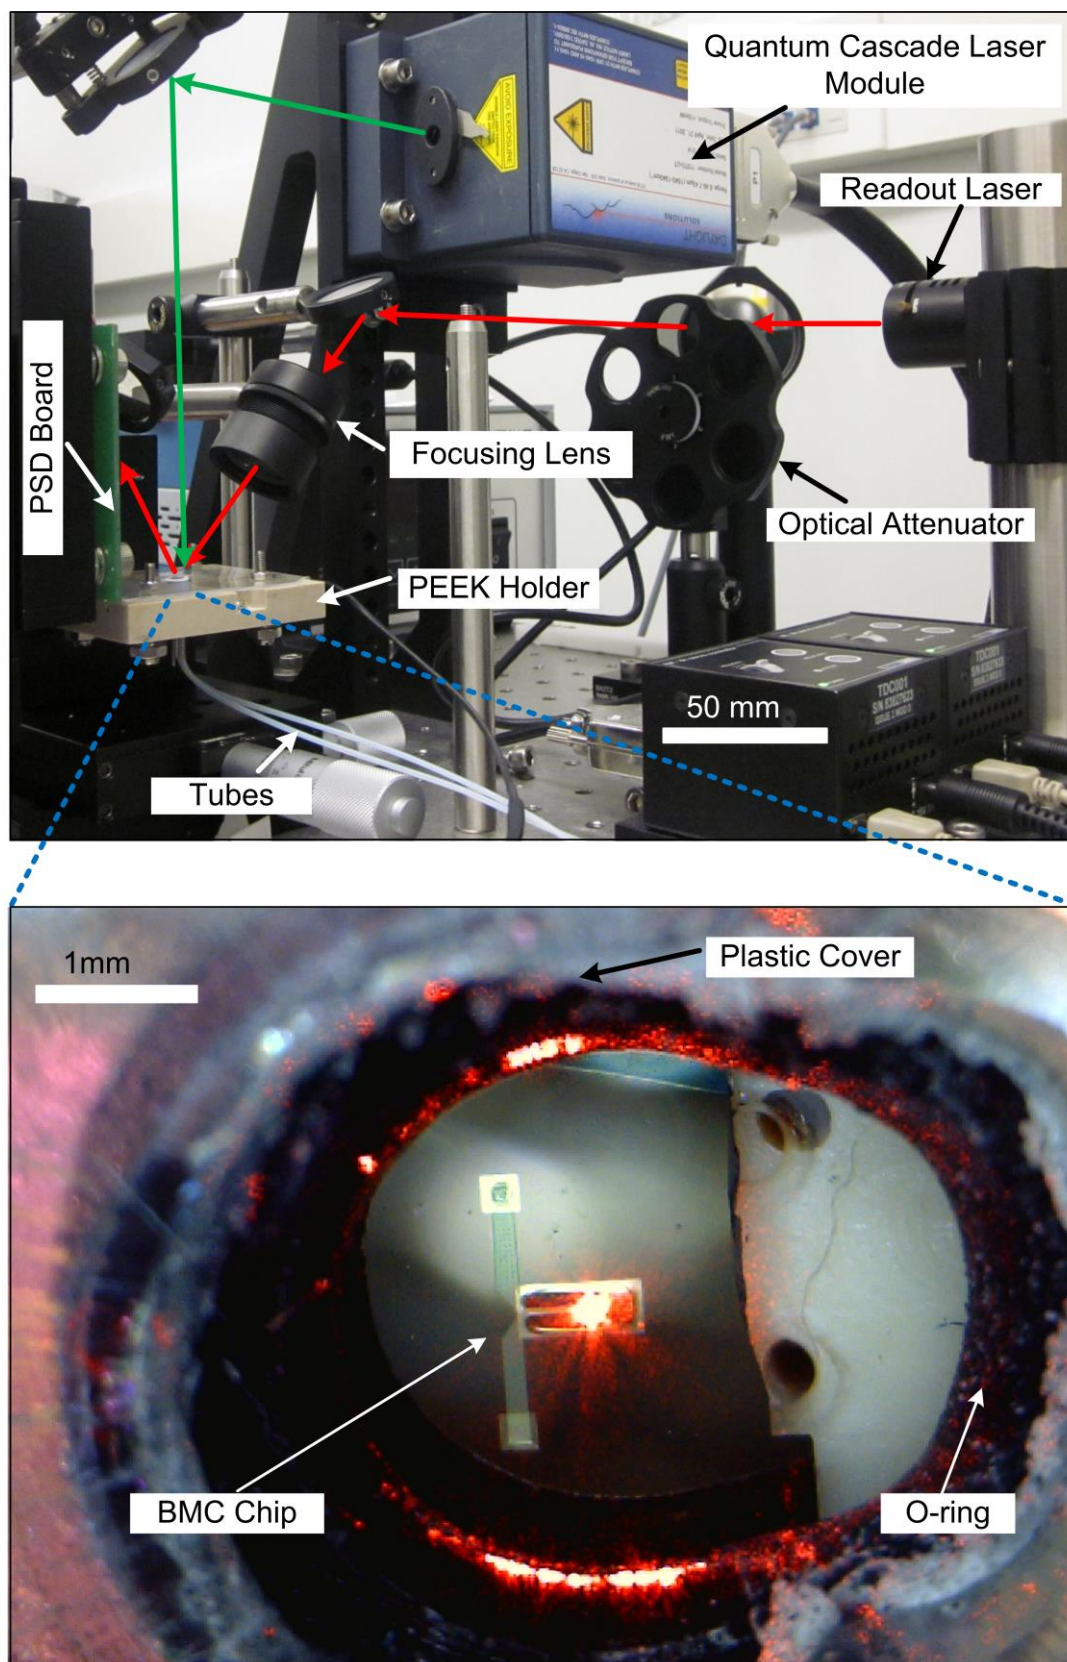

**Fig. S2.** Photograph of the experimental setup showing a QCL module, chip packaging, and readout laser. The zoom-in shows the top view of a chip with the readout laser focused at the tip of the BMC.

## **Loading liquid samples**

In order to load a sample inside the BMC, a vacuum pump is connected at the outlet tube, creating a pressure difference of 1000 mbar which pulls the liquid sample into the microchannel. Due to the hydrophilic nature of the SRN, the sample immediately fills the microchannel. The presence of the sample inside the cantilever is visually verified through the transparent SRN channel as well as the by change in the BMC's resonance frequency. A 50 pL liquid sample from inside the microchannel is used to collect the nanomechanical IR spectrum. The packaging is well-sealed, allowing for precise measurement of the nanomechanical IR spectrum of volatile liquid samples. Once the spectrum is measured, the sample is unloaded by applying negative pressure to the outlet of the chip. The chip is flushed with ethanol and water to remove sample residues.

## **Loading solid/viscous polymeric samples**

The BMC can be used not only for liquid samples; it also has a capability to measure IR spectra of solid or viscous polymeric samples. In order to take measurement such as these, the microchannel should be completely filled with the sample. In our experiments, a small quantity of these samples is placed on the backside of the BMC chip, as shown in Fig. S3a. The chip is then heated to the sample's melting temperature. The molten sample flows into the channel as a result of strong capillary forces, as shown in Fig. S3b. Once the microchannel is filled with the sample, the cantilever as well as the sample inside the microchannel, is cooled to room temperature in order to measure its nanomechanical IR spectrum. Fig. S3c shows a cantilever filled with a solid sample. One disadvantage of using this method is that after the measurement, the sample cannot be completely removed rendering the whole chip unusable.

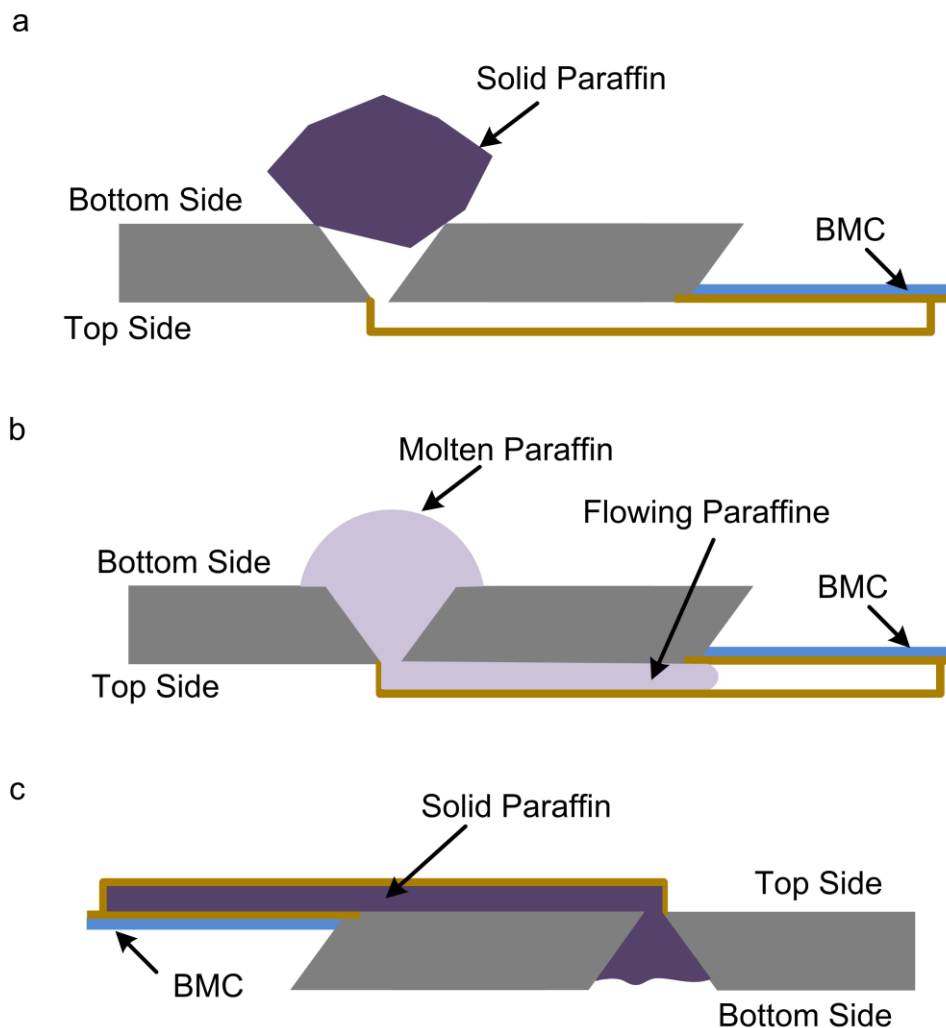

**Fig. S3.** Loading a solid sample **(a)** A small amount of solid paraffin is placed on the bottom side of a BMC chip **(b)** The chip is heated up to melting point of the sample. The molten paraffin flows inside the microchannel **(c)** To take a measurement the chip is cooled to room temperature.

### Baseline IR spectra

Before loading a liquid sample, a baseline IR spectrum is measured with the empty BMC. Fig. S4 shows an example of baseline spectra (from  $1540\text{ cm}^{-1}$  to  $1145\text{ cm}^{-1}$ ) which are measured for the results of different liquid samples reported in Fig. S6. In this particular example, the baseline spectra are measured with the empty BMC while using  $\ddot{\text{U}}\text{T-7}$  and  $\ddot{\text{U}}\text{T-8}$ . The IR intensity (of both QCLs) is not uniform throughout the bandwidth. The  $\ddot{\text{U}}\text{T-7}$  and  $\ddot{\text{U}}\text{T-8}$  have maximum energy approximately at  $1430\text{ cm}^{-1}$  and  $1304\text{ cm}^{-1}$  respectively, and minimum energy at  $1340\text{ cm}^{-1}$  and  $1145\text{ cm}^{-1}$ , respectively. As a baseline, the spectrum shows the cantilever

deflection as broad upward peaks.

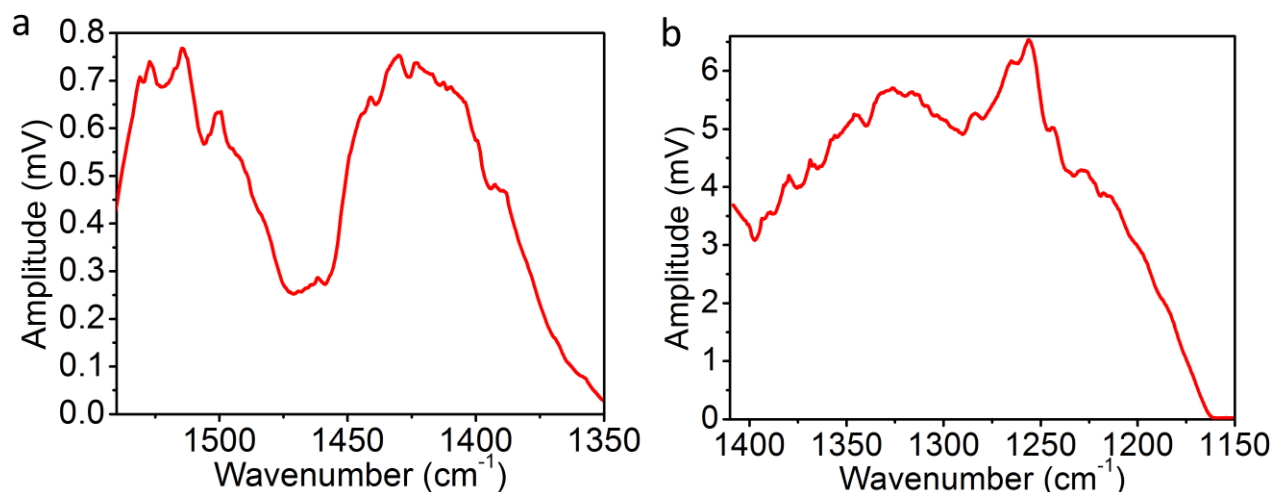

**Fig. S4.** Baseline spectra of the BMC for the results reported in Fig. S6 (a) The spectrum is measured with UT-7. The BMC deflects at  $1520\text{ cm}^{-1}$  and  $1420\text{ cm}^{-1}$  (b) The spectrum is measured with UT-8. The BMC deflects at  $1325\text{ cm}^{-1}$ , and  $1250\text{ cm}^{-1}$ . The cantilever deflections, in both cases, may be caused by IR absorption of SRN and air (present inside the empty BMC).

### Nanomechanical IR spectra of ampicillin sodium salt

The BMC is used to measure IR spectra of 1, 2.5, 5 and 10 wt% of ampicillin sodium salt (Fig. S5). The results are compared with standard FTIR spectra in ATR mode. For the concentration of 10 wt% a clear match at  $1400\text{ cm}^{-1}$  and  $1456\text{ cm}^{-1}$  are found between the results by both techniques.



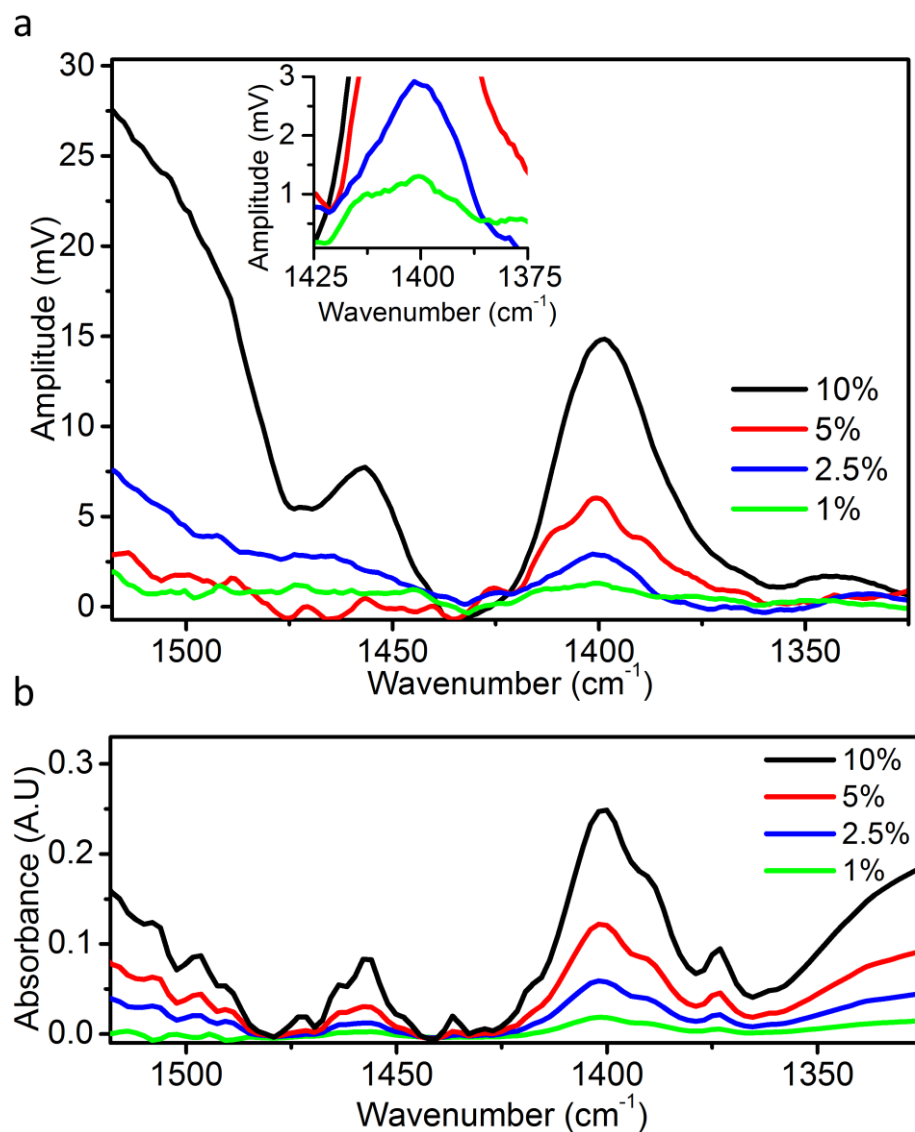

**Fig. S5.** (a) Nanomechanical IR spectra of ampicillin sodium salt. The inset shows zoomed in data at 1400 cm<sup>-1</sup> for 1% ampicillin sodium salt. (b) FTIR-ATR spectra of ampicillin sodium salt.

### Nanomechanical IR spectra of multiple analytes

Using the BMC, we measured nanomechanical IR spectra of multiple organic analytes, including n-hexadecane, isopropanol, naphtha, and paraffin, as shown in Fig. S6. The spectra are separately measured from 1540 cm<sup>-1</sup> to 1350 cm<sup>-1</sup> and from 1410 cm<sup>-1</sup> to 1150 cm<sup>-1</sup> by using ÛT-7 and ÛT-8 respectively.

As all chemicals have some common part in their molecular structure therefore the BMC also

deflected at similar wavenumber. The green shaded area indicates an example of common peaks at  $1385\text{ cm}^{-1} - 1370\text{ cm}^{-1}$  which is caused by  $\text{CH}_3$  symmetric scissoring in the aliphatic molecules. It is noted that for same chemicals but different QCLs, the peaks in horizontal rows (under green shaded area in Fig. S6) matched quite well with a maximum variation of three wavenumber, in case of naphtha. Under grey shaded area, the peaks in the range of  $1475\text{ cm}^{-1} - 1450\text{ cm}^{-1}$  are caused by  $\text{CH}_3$  anti-symmetric and  $\text{CH}_2$  scissoring. In addition, isopropanol shows C-OH bending at  $1250\text{ cm}^{-1}$  and CC-H in-plane bending at  $1345\text{ cm}^{-1}$ . Naphtha has a broad peak at  $1263\text{ cm}^{-1}$  which is probably caused by complex hydrocarbons. Paraffin and isopropanol exhibit  $\text{CH}_2$  twisting at  $1308\text{ cm}^{-1}$  while paraffin has  $\text{CH}_2$  bending at  $1467\text{ cm}^{-1}$ . The data is plotted after smoothing using a Savitzky–Golay filter.



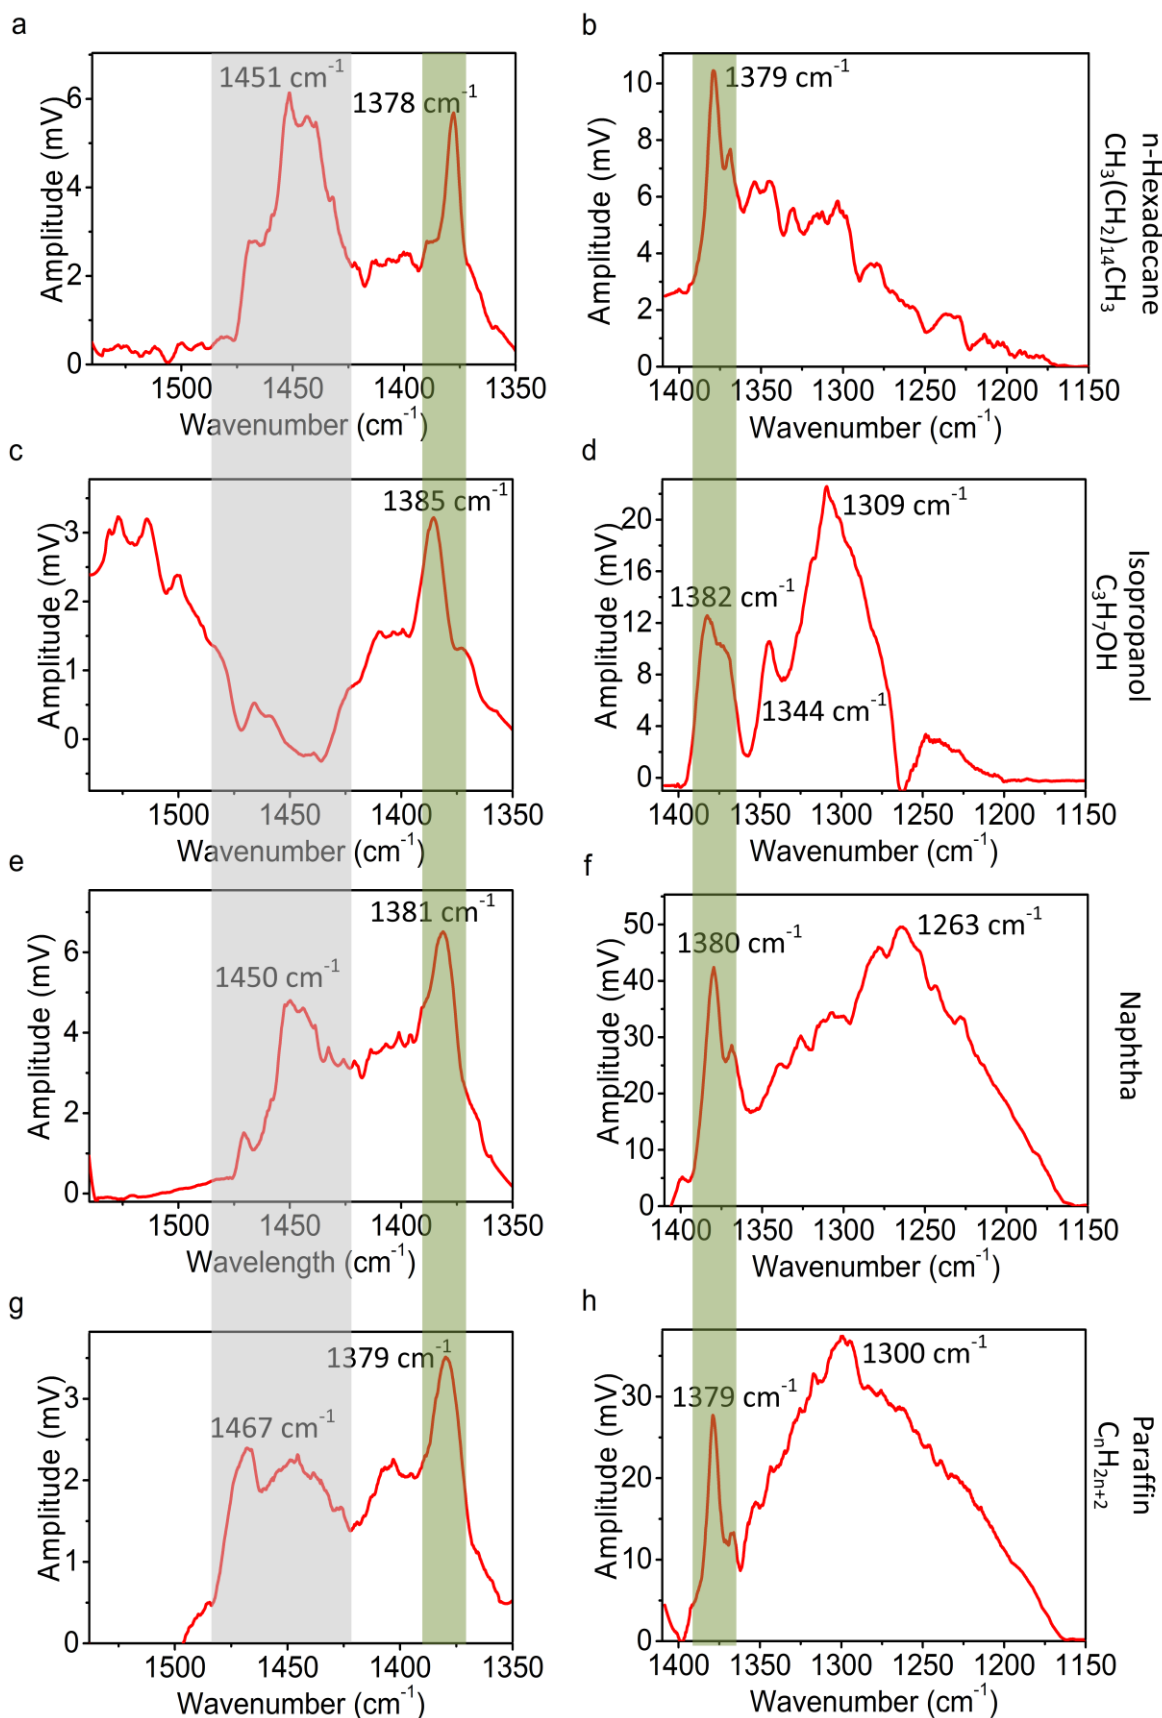

**Fig. S6.** Nanomechanical IR spectra of multiple organic compounds (a,b) n-Hexadecane, (c,d) isopropanol, (e,f) naphtha, (g,h) paraffin. ÜT-7 and ÜT-8 are used to measure these results in the

range of  $1540\text{ cm}^{-1}$  to  $1350\text{ cm}^{-1}$  and from  $1410\text{ cm}^{-1}$  to  $1150\text{ cm}^{-1}$  respectively. In the green shaded area, the spectra show IR absorption peaks at about  $1380\text{ cm}^{-1}$  which is caused by  $\text{CH}_3$  symmetric scissoring. Additionally at  $1380\text{ cm}^{-1}$ , the peaks measured by ÜT-7 and ÜT-8 well overlap on each other. The grey shaded area covers the peaks from  $1475\text{ cm}^{-1}$  –  $1450\text{ cm}^{-1}$  which are caused by  $\text{CH}_3$  anti-symmetric and  $\text{CH}_2$  scissoring. The spectra match well with standard FTIR spectra from literature.

## Measuring mass density of a solution

The capability of the BMC to perform chemical characterization of liquids (by measuring nanomechanical IR spectra) is complemented by quantitative measurement of the physical properties of liquids. To measure the mass density of ethanol-water binary solutions, the BMC is calibrated with ethanol and de-ionized water at room temperature. The fundamental resonance frequency of a BMC,  $f_0$ , can be modeled as that of a solid cantilever with a changing density<sup>1</sup>. With the assumption that the fluid in the microchannel does not change the effective Young's modulus of the BMC,  $f_0$  can be written as:

$$f_0 = \frac{A}{\sqrt{B + \rho_f}} \quad (\text{S1})$$

where  $A$  and  $B$  are constants which can be determined from the resonance frequency measurements of two different fluids with well-known mass densities, such as ethanol and de-ionized water. Knowing  $A$  and  $B$  of the BMC, the mass density of the fluid in the microchannel can be determined by:

$$\rho_f = \left( \frac{A}{f_0} \right)^2 - B \quad (\text{S2})$$

In the case of ethanol-water binary solutions (main Fig. 3b), fundamental resonance frequencies of the BMC are measured using three ethanol-water binary mixtures containing 5, 10, and 20 wt% of ethanol. The mass densities of these three solutions are calculated using Eq. S2. As the ethanol content decreases, the density of the binary solutions increases, and therefore the

resonance frequency of the BMC decreases. In Fig. 3b, a fit function (Eq. S2) can help to determine the mass density of an ethanol-water binary mixture with an unknown ethanol concentration.

## Reference

1. M.F. Khan, S. Schmid, Z.J. Davis and A. Boisen. *Microelectron. Eng.*, 2011, **8**, 2300-2303
